# Supplementary material for: Novel pathomechanism for spontaneous bacterial peritonitis: disruption of cell junctions by cellular and bacterial proteases
Source: HighWire-hosted journal article supplement (doi:10.1136/gutjnl-2020-321663), 2021-03-11
Supplement: gutjnl-2020-321663supp001_data_supplement.pdf [file gutjnl-2020-321663supp001_data_supplement.pdf]

## Novel pathomechanism for spontaneous bacterial peritonitis - Disruption of cell junctions by cellular and bacterial proteases

Marika Haderer<sup>1</sup>, Philip Neubert<sup>1</sup>, Eva Rinner<sup>1</sup>, Annika Scholtis<sup>1</sup>, Lucile Broncy<sup>1</sup>, Heidi Gschwendtner<sup>1</sup>, Arne Kandulski<sup>1</sup>, Vlad Pavel<sup>1</sup>, Alexander Mehr<sup>1</sup>, Christoph Brochhausen<sup>2</sup>, Sophie Schlosser<sup>1</sup>, Karsten Gülow<sup>1</sup>, Claudia Kunst<sup>1</sup> and Martina Müller<sup>1\*</sup>

<sup>1</sup>Department of Internal Medicine I, Gastroenterology, Hepatology, Endocrinology, Rheumatology and Infectious diseases, University Hospital Regensburg, Regensburg, Germany

<sup>2</sup>Institute of Pathology, University Regensburg, Regensburg, Germany

## Supplements

### Supplementary Material and Methods

**Chemicals and reagents** *E. coli* O55:H5 lipopolysaccharide (LPS), phorbol 12-myristate 13-acetate, MMP inhibitors BB-94, BB-2516 and proteasome inhibitor clasto-lactacystin  $\beta$ -lactone (LA) were purchased from Sigma-Aldrich, Taufkirchen, Germany. DMSO served as control for LA, BB-94 and BB-2516, PBS for LPS and EtOH for phorbol 12-myristate 13-acetate.

**Crystal violet assay** Cells were washed with PBS, fixed with 80% EtOH and stained with crystal violet (0.5% crystal violet, 20% EtOH) (Sigma-Aldrich, Taufkirchen, Germany) for 10min. Afterwards, cells were washed with water and air dried.

**Transwell experiments** To characterize bacteria-to-cell interactions, *E. coli* were added at MOI 5 onto transwell inserts (0.4 $\mu$ m pore size, Corning, Wiesbaden, Germany) on top of Caco-2 cells for 4 h. As a control, Caco-2 cells were directly co-cultured with *E. coli*.

**RNA isolation and reverse transcription** Cells were harvested in RLT buffer (Qiagen, Hilden, Germany). RNA isolation and reverse transcription were performed according to the manufacturer's protocol of RNeasy Kit and QuantiTect Reverse Transcription Kit (Qiagen, Hilden, Germany).

**Quantification of gene expression** Expression of the following genes was analyzed by qRT-PCR using a Light Cycler 480 RT-PCR System (Roche, Mannheim, Germany): *CDH1*, *OCLN*, *MMP-1*, *-3*, *-7*, *-9*, *-10*, *-13*, *-14*, tissue inhibitor of MMPs (*TIMP*)-2, *MUC2*, *MUC5AC* and *GAPDH*. *GAPDH* served as internal standard. Primers for *MMP-7* and *MMP-9* were purchased from Qiagen (Hilden, Germany). All other primers were purchased from Metabion (Planegg, Germany) and corresponding sequences are provided in **supplementary table 7**. Data were analyzed based on the double cycle threshold method using the average cycle threshold values of triplicates.

**Western blot analysis** Cells were washed with PBS three times, lysed with RIPA buffer containing protease and phosphatase inhibitor cocktail (cOmplete ULTRA, phosSTOP, Sigma-Aldrich, Taufkirchen, Germany). Samples were

incubated on ice for 1h, spun at 16,000xg for 1h at 4°C and supernatant was collected. 10-30µg protein were separated by Western blot. Anti-ALPI (TA809178, OriGene Technologies, Rockville, USA), anti-CDH1, anti-GAPDH (3195/2118; Cell Signaling Technology, Danvers, MA, USA), anti-OCN (NBP1-87402, Novus Biologicals, Abingdon, UK), anti-ubiquitin (05-1307, Millipore, Darmstadt, Germany), anti-β-actin (A3854, Sigma-Aldrich, Taufkirchen, Germany), anti-rabbit IgG and anti-mouse IgG (A0545/ A9044, Sigma-Aldrich, Taufkirchen, Germany) were used. Densitometry was performed using Image Lab Software (Bio-Rad Laboratories Inc., Munich, Germany) and Fusion Pulse TS (Vilber Lourmat, Eberhardzell, Germany) or Image Studio Lite Version 5.2 (Lincoln, NE, USA).

**Immunofluorescence and microscopy** Cells were grown on chamber slides (Thermo Fisher Scientific, Waltham, MA; USA), washed with PBS, fixed with 4% formaldehyde and permeabilized with 2% saponin, each for 15min. Cells were blocked in 5% BSA and stained using the following antibodies or isotype controls for 1h: mouse anti-occludin-488 (OC-3F10, Invitrogen, Carlsbad, CA, USA) or rat anti-E-cadherin-594 and mouse/rat 488/594-labeled isotype controls (DECMA-1/MOPC-21/RTK2071, BioLegend, London, UK). Cells were washed and labeled with 300nM DAPI for 3min.

To stain colon biopsies of patients with SBP and control patients, mouse anti-occludin-594 antibody (OC-3F10, Thermo Scientific, Waltham, MA, USA), rat anti-E-cadherin-594 and 594-labeled mouse/rat isotype control (MOPC-21, Biolegend, London, UK; DECMA-1/MOPC-21/RTK2071, BioLegend, London, UK) were applied.

**Electron microscopy** Cells, cultured on Thermanox cover slides (Thermo Fisher Scientific, Waltham, MA; USA), were fixed with 0.1 M cacodylate-buffered Karnovsky solution (2% paraformaldehyde and 2.5% glutaraldehyde) followed by enclosure in 4% low-melting agarose and post-fixation with 1% cacodylate-buffered osmium tetroxide for 2 h. Cells were dehydrated in graded ethanol and embedded in Embed812 epoxy resin (= EPON, all reagents from EMS/Science Services Munich, Germany). After heat polymerization for 2 days at 60°C, semithin sections (0.8µm thickness) were obtained by means of ultramicrotome and stained with toluidine blue and basic fuchsine. Ultrathin sections (80 nm thickness) were cut with a diamond knife (DIATOME, Biel, Switzerland) mounted on grids (100 and 200 mesh) and double contrasted with aqueous uranyl acetate (2%) and lead citrate (Ultrastain II LEICA, Wetzlar, Germany) for 10min each. Sections were examined by a LEO912AB electron microscope. Findings were documented with a side-mounted 2k x 2k CCD camera (TRS, Moorenweis, Germany) with iTEM software (OSIS, Münster, Germany).

**Immunoprecipitation and detection of ubiquitination of occludin and E-cadherin** NP40 lysis buffer (150mM NaCl, 1% NP40, 50mM Tris pH 8.0 containing protease and phosphatase inhibitor cocktail) was used for cell lysis. Protein-A-agarose (P-9262, Sigma-Aldrich, Taufkirchen, Germany) was coupled with 200µg lysate in NP40 lysis buffer containing 2% BSA for at least 1.5h at 4°C. Simultaneously, E-cadherin (5296, Cell Signaling Technology, Danvers, MA, USA) and occludin (711500, Invitrogen, Carlsbad, CA) antibodies at 2–2.5µg were incubated with protein-A-agarose beads for 1.5 h at 4°C. Precleared supernatant and coupled antibodies were incubated for 2h at 4°C. The precipitated pellet was

washed with NP40 lysis buffer and analyzed by Western blot. 20µg cell lysate represented the input, the pellet of precleared supernatant (clear) was the control.

**Flow Cytometry** For toll like receptor (TLR) analysis (shown in **supplementary figure 3**) Caco-2 cells were blocked with PBS supplemented with 10% fetal bovine serum for 10min. Staining was performed in the dark for 20min using anti-TLR2-PE and anti-TLR4-FITC (12-9922-42/53-9917-42, eBioscience, Vienna, Austria) with corresponding isotype controls (mouse IgG2a-PE, 12-4724-81, Invitrogen, Carlsbad, CA, USA; mouse IgG2a-488, 53-4724-80, eBioscience, Vienna, Austria) in staining buffer (554657, BD, Heidelberg, Germany).

**Supplementary tables****Supplementary table 1** Characteristics of healthy controls and patients with liver cirrhosis shown in **figure 1**.

|                                                                  | non-cirrhotic controls (n = 19)                 | liver cirrhosis (n = 14)                           |
|------------------------------------------------------------------|-------------------------------------------------|----------------------------------------------------|
| median age                                                       | 58.6 (35-83)                                    | 57.0 (48-75)                                       |
| sex M/F                                                          | 11/8                                            | 8/6                                                |
| etiology of cirrhosis (alcohol-related/toxic/PSC/Caroli disease) |                                                 | 10/2/1/1                                           |
| Child-Pugh class A/B/C                                           |                                                 | 7/2/5                                              |
| model for end-stage liver disease (MELD)-score                   |                                                 | 12.9 (7-32)                                        |
| diagnosis of hepatocellular carcinoma (HCC)                      |                                                 | 3                                                  |
| portal hypertension*                                             |                                                 | 14                                                 |
| spontaneous bacterial peritonitis (SBP)                          |                                                 | 5                                                  |
| ascites                                                          |                                                 | 9                                                  |
| antibiotic therapy                                               | 2 (piperacillin/tazobactam, clarithromycin)     | 6 (piperacillin/tazobactam, vancomycin, rifaximin) |
| use of non-steroidal anti-inflammatory drugs                     | 4 (ibuprofen, acetylsalicylic acid, etoricoxib) | 1 (acetylsalicylic acid)                           |
| use of corticosteroids                                           | 3 (prednisolone, beclomethasone)                | 1 (prednisolone)                                   |
| use of proton pump inhibitors (PPI)                              | 9 (omeprazole, pantoprazole)                    | 7 (pantoprazole)                                   |

\* portal hypertension was defined by either vascular alterations, ascites, hepatic transjugular intrahepatic portosystemic shunt (TIPSS), hepatopulmonary syndrome (HPS), hypersplenism, portal hypertensive gastropathy (PHG), esophageal varices, esophageal variceal bleeding, hepatic encephalopathy (HE), thrombocytopenia or postsurgical decompensation.[1,2]

1 **Supplementary table 2:** Characteristics of the PPI-negative control patients, depicted in **figure 1**.

| Nr | age | gender | diagnosis                   | indication for colonoscopy | portal hypertension* | SBP | PPI | antibiotic | anti-inflammatory drugs                                       | mucus thickness (µm) |
|----|-----|--------|-----------------------------|----------------------------|----------------------|-----|-----|------------|---------------------------------------------------------------|----------------------|
| 1  | 67  | m      | diverticulosis              | diarrhea                   | no                   | no  | no  | no         | no                                                            | 15.67                |
| 2  | 50  | m      | abdominal pain              | diagnostic colonoscopy     | no                   | no  | no  | no         | no                                                            | 10.11                |
| 3  | 36  | m      | perianal pain               | tumor exclusion            | no                   | no  | no  | no         | no                                                            | 23.29                |
| 4  | 57  | m      | bacterial overgrowth        | diarrhea                   | no                   | no  | no  | yes        | yes (beclomethasone)                                          | 10.5                 |
| 5  | 82  | f      | polymyalgia rheumatica      | tumor exclusion            | no                   | no  | no  | no         | yes (prednisolone)                                            | 23.0                 |
| 6  | 40  | m      | diagnostic colonoscopy      | tumor exclusion            | no                   | no  | no  | no         | no                                                            | 19.5                 |
| 7  | 80  | m      | amyloidosis                 | rectal biopsy              | no                   | no  | no  | no         | no                                                            | 18.43                |
| 8  | 68  | m      | history of heart transplant | tumor exclusion            | no                   | no  | no  | no         | yes (mycophenolic acid, etoricoxib, prednisolone, everolimus) | 12.13                |
| 9  | 76  | f      | abdominal pain              | tumor exclusion            | no                   | no  | no  | no         | no                                                            | 12.56                |
| 10 | 83  | f      | coronary heart disease      | tumor exclusion            | no                   | no  | no  | no         | yes (acetylsalicylic acid)                                    | 13.33                |

2 \*portal hypertension was defined by either vascular alterations, ascites, hepatic transjugular intrahepatic portosystemic shunt (TIPSS), hepatopulmonary syndrome (HPS), hypersplenism, portal  
3 hypertensive gastropathy (PHG), esophageal varices, esophageal variceal bleeding, hepatic encephalopathy (HE), thrombocytopenia or postsurgical decompensation.[1,2]

4

5 **Supplementary table 3:** Characteristics of the PPI-positive control patients, depicted in **figure 1**.

| Nr. | age | gender | diagnosis                                              | indication for colonoscopy | portal hypertension* | SBP | PPI | antibiotic | anti-inflammatory drugs    | mucus thickness (µm) |
|-----|-----|--------|--------------------------------------------------------|----------------------------|----------------------|-----|-----|------------|----------------------------|----------------------|
| 11  | 61  | m      | screening colonoscopy                                  | screening colonoscopy      | no                   | no  | yes | no         | yes (ibuprofen)            | 10.14                |
| 12  | 51  | f      | evaluation liver donation                              | tumor exclusion            | no                   | no  | yes | no         | no                         | 12.44                |
| 13  | 62  | f      | evaluation kidney donation                             | tumor exclusion            | no                   | no  | yes | no         | no                         | 9.75                 |
| 14  | 46  | m      | weight loss                                            | tumor exclusion            | no                   | no  | yes | no         | no                         | 35.88                |
| 15  | 42  | f      | familial renal cystic disease                          | tumor exclusion            | no                   | no  | yes | no         | no                         | 11.86                |
| 16  | 46  | m      | evaluation heart transplant<br>ischemic cardiomyopathy | tumor exclusion            | no                   | no  | yes | no         | yes (acetylsalicylic acid) | 17.5                 |
| 17  | 72  | f      | iron deficiency anemia                                 | tumor exclusion            | no                   | no  | yes | yes        | no                         | 15.33                |
| 18  | 35  | m      | infectious colitis                                     | diarrhea                   | no                   | no  | yes | no         | no                         | 14.75                |
| 19# | 60  | f      | diverticulosis                                         | diarrhea                   | no                   | no  | yes | no         | no                         | 17.29                |

6

7 \*portal hypertension was defined by either vascular alterations, ascites, hepatic transjugular intrahepatic portosystemic shunt (TIPSS), hepatopulmonary syndrome (HPS), hypersplenism, portal  
8 hypertensive gastropathy (PHG), esophageal varices, esophageal variceal bleeding, hepatic encephalopathy (HE), thrombocytopenia or postsurgical decompensation.[1,2]

9 #patients who donated colonic biopsies and are shown in **figure 1C**

10

11 **Supplementary table 4** Characteristics of the PPI-negative patients with liver cirrhosis depicted in **figure 1**.

| Nr.            | age | gender | diagnosis                                | indication for colonoscopy | Child–Pugh score | MELD | portal hypertension *                                                                     | SBP                                                        | PPI | antibiotic | anti-inflammatory drugs | mucus thickness (µm) |
|----------------|-----|--------|------------------------------------------|----------------------------|------------------|------|-------------------------------------------------------------------------------------------|------------------------------------------------------------|-----|------------|-------------------------|----------------------|
| 1              | 75  | m      | alcohol-related liver disease            | tumor exclusion            | A                | 15   | yes (vascular alterations, ascites, HPS, HE)                                              | no                                                         | no  | no         | no                      | 14.00                |
| 2              | 60  | m      | alcohol-related liver disease            | tumor exclusion            | A                | 16   | yes (vascular alterations, hypersplenism, PHG, esophageal, varices)                       | no                                                         | no  | no         | no                      | 7.43                 |
| 3              | 49  | f      | drug-induced liver disease               | tumor exclusion            | A                | 18   | yes (thrombocytopenia)                                                                    | no                                                         | no  | yes        | no                      | 6.86                 |
| 4              | 52  | f      | alcohol-related liver disease            | tumor exclusion            | B                | 8    | yes (vascular alterations, TIPSS, hypersplenism, PHG, HCC)                                | no                                                         | no  | no         | no                      | 6.56                 |
| 5 <sup>#</sup> | 57  | m      | liver cirrhosis caused by Caroli disease | tumor exclusion            | B                | 12   | yes (ascites, TIPSS with dysfunction, HPS, splenomegaly, HE, postsurgical decompensation) | yes ( <i>E. coli</i> )<br>( <b>supplementary table 6</b> ) | no  | yes        | yes (ASS)               | 10.87                |
| 6 <sup>#</sup> | 48  | f      | primary sclerosing cholangitis           | tumor exclusion            | C                | 17   | yes (vascular alterations, ascites, HPS, hypersplenism, PHG, HCC)                         | no                                                         | no  | yes        | no                      | 20.39                |
| 7              | 57  | m      | alcohol-related liver disease            | tumor exclusion            | C                | 32   | yes (ascites, HPS, hypersplenism, PHG, esophageal varices, postsurgical decompensation)   | no                                                         | no  | yes        | no                      | 10.68                |

12

13 \* portal hypertension was defined by either vascular alterations, ascites, hepatic transjugular intrahepatic portosystemic shunt (TIPSS), hepatopulmonary syndrome (HPS), hypersplenism, portal  
14 hypertensive gastropathy (PHG), esophageal varices, esophageal variceal bleeding, hepatic encephalopathy (HE), thrombocytopenia or postsurgical decompensation.[1,2]

15 <sup>#</sup> patients who donated colonic biopsies and are shown in **figure 1C**

16

17 **Supplementary table 5** Characteristics of the PPI-positive patients with liver cirrhosis depicted in **figure 1**.

| Nr.             | age | gender | diagnosis                         | indication for colonoscopy | Child-Pugh score | MELD | portal hypertension*                                                                                  | SBP                                                        | PPI | antibiotic | anti-inflammatory drugs | mucus thickness (µm) |
|-----------------|-----|--------|-----------------------------------|----------------------------|------------------|------|-------------------------------------------------------------------------------------------------------|------------------------------------------------------------|-----|------------|-------------------------|----------------------|
| 8               | 52  | f      | alcohol-related liver disease     | tumor exclusion            | A                | 7    | yes (vascular alterations, TIPSS with slight dysfunction, hypersplenism, PHG, esophageal varices 0-I) | no                                                         | yes | no         | no                      | 10.00                |
| 9               | 58  | f      | nutritional-toxic liver cirrhosis | tumor exclusion            | A                | 10   | yes (hypersplenism, PHG, esophageal varices)                                                          | no                                                         | yes | no         | no                      | 9.38                 |
| 10 <sup>#</sup> | 61  | m      | alcohol-related liver disease     | tumor exclusion            | A                | 7    | yes (ascites, HPS)                                                                                    | no                                                         | yes | no         | no                      | 17.86                |
| 11              | 53  | f      | alcohol-related liver disease     | tumor exclusion            | A                | 7    | yes (ascites, PHG, HCC, HE)                                                                           | yes                                                        | yes | no         | no                      | 8.33                 |
| 12 <sup>#</sup> | 61  | m      | alcohol-related liver disease     | tumor exclusion            | C                | 10   | yes (ascites, thrombocytopenia, HE)                                                                   | yes                                                        | yes | no         | no                      | 11.22                |
| 13 <sup>#</sup> | 60  | m      | alcohol-related liver disease     | tumor exclusion            | C                | 14   | yes (ascites, TIPSS with dysfunction, HPS, hypersplenism, HE, postsurgical decompensation)            | yes                                                        | yes | yes        | yes (prednisolone)      | 15.14                |
| 14 <sup>#</sup> | 55  | m      | alcohol-related liver disease     | tumor exclusion            | C                | 21   | yes (vascular alterations, ascites, hypersplenism, PHG, esophageal varices)                           | yes ( <i>E. coli</i> )<br>( <b>supplementary table 6</b> ) | yes | yes        | no                      | 17.38                |

18

19 \*portal hypertension was defined by either vascular alterations, ascites, hepatic transjugular intrahepatic portosystemic shunt (TIPSS), hepatopulmonary syndrome (HPS), hypersplenism, portal  
20 hypertensive gastropathy (PHG), esophageal varices, esophageal variceal bleeding, hepatic encephalopathy (HE), thrombocytopenia or postsurgical decompensation.[1,2]

21 <sup>#</sup> patients who donated colonic biopsies and are shown in **figure 1C**



22 **Supplementary table 6** Antibiograms of (patient-derived) bacteria (compare **supplementary table 4, 5**).

23 *E. coli* O6:Hnt , O16:H5 (PDEC 1), Ont:H7 (PDEC 2) and *P. mirabilis* were used for the *in vitro* studies.

| antibiotics                 | <i>E. coli</i><br>patient-derived<br>Child-Pugh C patient<br>(14) shown in <b>figure 1C</b> | <i>E. coli</i><br>patient-derived<br>Child-Pugh B patient<br>(5) shown in <b>figure 1C</b> | <i>E. coli</i> ATCC25922 O6:Hnt<br>( <i>in vitro</i> studies) | <i>E. coli</i> O16:H5<br>(PDEC 1)<br>patient-derived<br>( <i>in vitro</i> studies) | <i>E. coli</i> Ont:H7<br>(PDEC 2)<br>patient-derived<br>( <i>in vitro</i> studies) | <i>P. mirabilis</i><br>patient-derived<br>( <i>in vitro</i> studies) |
|-----------------------------|---------------------------------------------------------------------------------------------|--------------------------------------------------------------------------------------------|---------------------------------------------------------------|------------------------------------------------------------------------------------|------------------------------------------------------------------------------------|----------------------------------------------------------------------|
| ampicillin or amoxicillin   | resistant                                                                                   | resistant                                                                                  | sensitive*                                                    | resistant                                                                          | sensitive                                                                          | sensitive*                                                           |
| amoxicillin/clavulanic acid | intermediate                                                                                | sensitive*                                                                                 | sensitive*                                                    | resistant                                                                          | sensitive                                                                          | sensitive*                                                           |
| piperacillin                |                                                                                             | resistant                                                                                  |                                                               |                                                                                    |                                                                                    | sensitive                                                            |
| piperacillin/tazobactam     | sensitive                                                                                   | sensitive                                                                                  |                                                               | sensitive                                                                          | sensitive                                                                          | sensitive                                                            |
| cefuroxime (intravenous)    | sensitive                                                                                   | sensitive*                                                                                 | sensitive*                                                    | resistant                                                                          | sensitive                                                                          | sensitive*                                                           |
| ceftriaxone or cefotaxime   | sensitive                                                                                   | sensitive                                                                                  |                                                               | resistant                                                                          | sensitive                                                                          | sensitive                                                            |
| ceftazidime                 | sensitive                                                                                   | sensitive                                                                                  |                                                               | intermediate                                                                       | sensitive                                                                          | sensitive                                                            |
| cefepime                    | sensitive                                                                                   | sensitive                                                                                  |                                                               | resistant                                                                          | sensitive                                                                          | sensitive                                                            |
| imipenem                    | sensitive                                                                                   | sensitive                                                                                  |                                                               | sensitive                                                                          | sensitive                                                                          |                                                                      |
| meropenem                   | sensitive                                                                                   | sensitive                                                                                  |                                                               | sensitive                                                                          | sensitive                                                                          | sensitive                                                            |
| ertapenem                   | sensitive                                                                                   | sensitive                                                                                  |                                                               |                                                                                    | sensitive                                                                          | sensitive                                                            |
| ciprofloxacin               | resistant                                                                                   | resistant                                                                                  | sensitive                                                     | sensitive                                                                          | sensitive                                                                          | sensitive                                                            |
| levofloxacin                | resistant                                                                                   | resistant                                                                                  |                                                               |                                                                                    | sensitive                                                                          | sensitive                                                            |
| cotrimoxazole               | resistant                                                                                   | resistant                                                                                  | sensitive                                                     | sensitive                                                                          | sensitive                                                                          | sensitive                                                            |
| gentamicin                  | sensitive                                                                                   | resistant                                                                                  |                                                               |                                                                                    | sensitive                                                                          | sensitive                                                            |
| amikacin                    | sensitive                                                                                   | sensitive                                                                                  |                                                               |                                                                                    | sensitive                                                                          | sensitive                                                            |
| tobramycin                  |                                                                                             | resistant                                                                                  |                                                               |                                                                                    |                                                                                    | sensitive                                                            |
| tigecycline                 | sensitive                                                                                   | sensitive                                                                                  |                                                               |                                                                                    |                                                                                    | resistant                                                            |
| colistin                    |                                                                                             |                                                                                            |                                                               |                                                                                    |                                                                                    | resistant                                                            |
| fosfomycin                  |                                                                                             | sensitive                                                                                  |                                                               |                                                                                    |                                                                                    | sensitive                                                            |
| pivmecillinam               |                                                                                             | sensitive                                                                                  |                                                               |                                                                                    |                                                                                    |                                                                      |
| nitrofurantoin              | sensitive                                                                                   | sensitive                                                                                  |                                                               |                                                                                    | sensitive                                                                          |                                                                      |
| trimethoprim                |                                                                                             | resistant                                                                                  |                                                               |                                                                                    |                                                                                    | resistant                                                            |
| aztreonam                   | sensitive                                                                                   | sensitive                                                                                  |                                                               |                                                                                    | sensitive                                                                          | sensitive                                                            |
| ticarcillin/clavulanic acid |                                                                                             | intermediate                                                                               |                                                               |                                                                                    |                                                                                    | sensitive                                                            |

24

25 \* sensitive\* indicates that a higher dose of corresponding antibiotic agent should be used. PDEC = patient-derived *E. coli*.

26 **Supplementary table 7** Sequences of primers applied for qRT-PCR.

| gene   | forward (5' – 3')             | reverse (5' – 3')            |
|--------|-------------------------------|------------------------------|
| CDH1   | ATGAGTGTCCCCGGTATCT           | GGTCAGTATCAGCCGCTTTC         |
| OCLDN  | ACAAGCGGTTTTATCCAGAGTC        | GTCATCCACAGGCCAAGTTAAT       |
| MMP-1  | GCTCATGAACTCGGCCATTCTCTGGACT  | CGGGTAGAAGGGATTTGTGCGXATGTA  |
| MMP-3  | CCGAGAAATGCAGAAGTTCCTTGGATTGG | TCGGGATGCCAGGAAAGGTTCTGAAGTG |
| MMP-10 | TCTTGCAATTCCTTGTGCTGTTG       | ATTGCTGGGCAAGATCCTTGT        |
| MMP-13 | ACACCTACACCGGCAAAAGC          | CATTTGTCTGGCGTTTTTGA         |
| MMP-14 | GGCTGCCTACCGACAAGATT          | GTA CTGCTATCCACTGCC          |
| MUC-2  | CACCTGTGCCCTGGAAGGC           | CGGTCACGTGGGGCAGGTTTC        |
| MUC5AC | CGGGTCCACGAGGAGACGGT          | GCTTCTGCAGCCAGGCACGA         |
| TIMP-2 | CCCCAAGCAGGAGTTTCTCGACATCG    | TGGACCAGTCGAAACCCCTTGGAGGCT  |
| GAPDH  | CGACCACTTTGTCAAGCTCA          | GCTGGTCCAGGGGTCTTACT         |

27

28 **Supplementary figure legends**

29 **Supplementary figure 1** Characterization of the Caco-2 *in vitro* model. Caco-2 cells were cultured for  
30 1 to 14 days and cell confluence was analyzed *via* microscopy (upper panel). In addition, dead cells  
31 were labeled with 1µg/ml DAPI and cell death was examined *via* fluorescence microscopy (lower panel).

32 **Supplementary figure 2** Western blot analysis of cell-to-cell junction proteins E-cadherin and occludin  
33 in the Caco-2 *in vitro* model upon co-culture with ten patient-derived *E. coli* strains (**patient derived E.**  
34 **coli = PDEC**). (A) Caco-2 cells were co-cultured with different patient-derived *E. coli* strains (PDEC 1 –  
35 10) at MOI 10 for 4h. (B) E-cadherin and occludin protein levels were quantified by densitometry and  
36 relative changes to control were calculated. PDEC 1 = O16:H5 and PDEC 2 = Ont:H7 were chosen for  
37 further analyses.

38 **Supplementary figure 3** Surface expression of toll-like-receptor (TLR)2 and TLR4 on Caco-2 cells was  
39 studied by flow cytometry. Caco-2 cells were incubated with *E. coli* O55:H5 LPS (10µg/ml) or phorbol  
40 12-myristate 13-acetate (PMA) (10ng/ml) for 24h. Caco-2 cells with LPS or phorbol 12-myristate 13-  
41 acetate (PMA) stimulation are shown in yellow, isotype controls in grey. As positive controls for TLR2  
42 and TLR4 expression HEK-blue IL-2 and U937 cells were used (red), isotype controls in blue.

43 **Supplementary figure 4** *P. mirabilis*-induces caspase-independent cell death of Caco-2 cells. Flow  
44 cytometric DAPI exclusion analysis of Caco-2 cells stimulated with patient-derived *P. mirabilis* (MOI 10,  
45 4 h). Prior to bacterial treatment, Caco-2 cells were stimulated either with 10 µM BB-94 or 50 µM of the  
46 pan-caspase inhibitor zVAD-FMK (Selleckchem, Munich, Germany) for 20min. Caco-2 cells co-cultured  
47 with *P. mirabilis* (i) in total (attached + detached), (ii) attached and (iii) detached were analyzed (n = 3).  
48 One representative flow cytometric blot of each sample is shown.

10

49 **References for supplementary table 1 - 5**

- 50 1 Qi X, Berzigotti A, Cardenas A, *et al.* Emerging non-invasive approaches for diagnosis and  
51 monitoring of portal hypertension. *Lancet Gastroenterol Hepatol* 2018;3:708–19.
- 52 2 Garcia-Tsao G, Abraldes JG, Berzigotti A, *et al.* Portal hypertensive bleeding in cirrhosis: Risk  
53 stratification, diagnosis, and management: 2016 practice guidance by the American  
54 Association for the study of liver diseases. *Hepatology* 2017;65:310–35.

55
