# Supplementary material for: Novel pathomechanism for spontaneous bacterial peritonitis: disruption of cell junctions by cellular and bacterial proteases
Source: HighWire-hosted journal article supplement (doi:10.1136/gutjnl-2020-321663), 2021-03-11

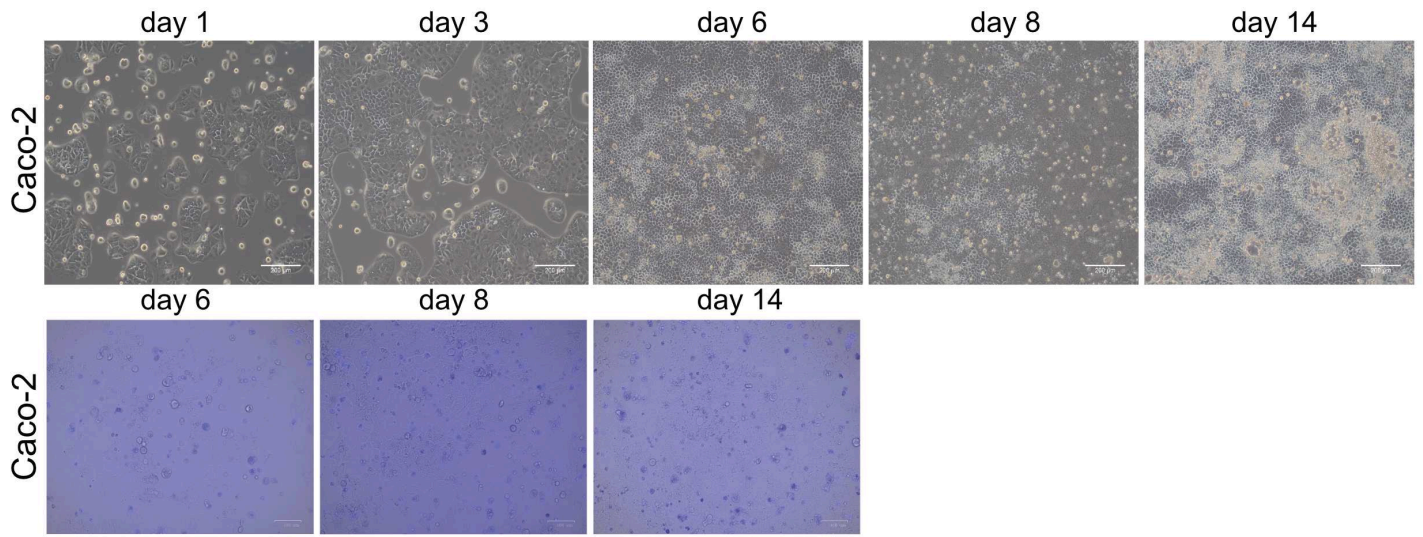

Supplement: gutjnl-2020-321663supp002_data_supplement.pdf [file gutjnl-2020-321663supp002_data_supplement.pdf]
