# Supplementary figures and images for: Novel pathomechanism for spontaneous bacterial peritonitis: disruption of cell junctions by cellular and bacterial proteases
Source: PubMed Central journal article supplement — Gut. 2021 Mar 11;71(3):580–92. doi: 10.1136/gutjnl-2020-321663 (PMC8862089; doi:10.1136/gutjnl-2020-321663), 2021-03-11

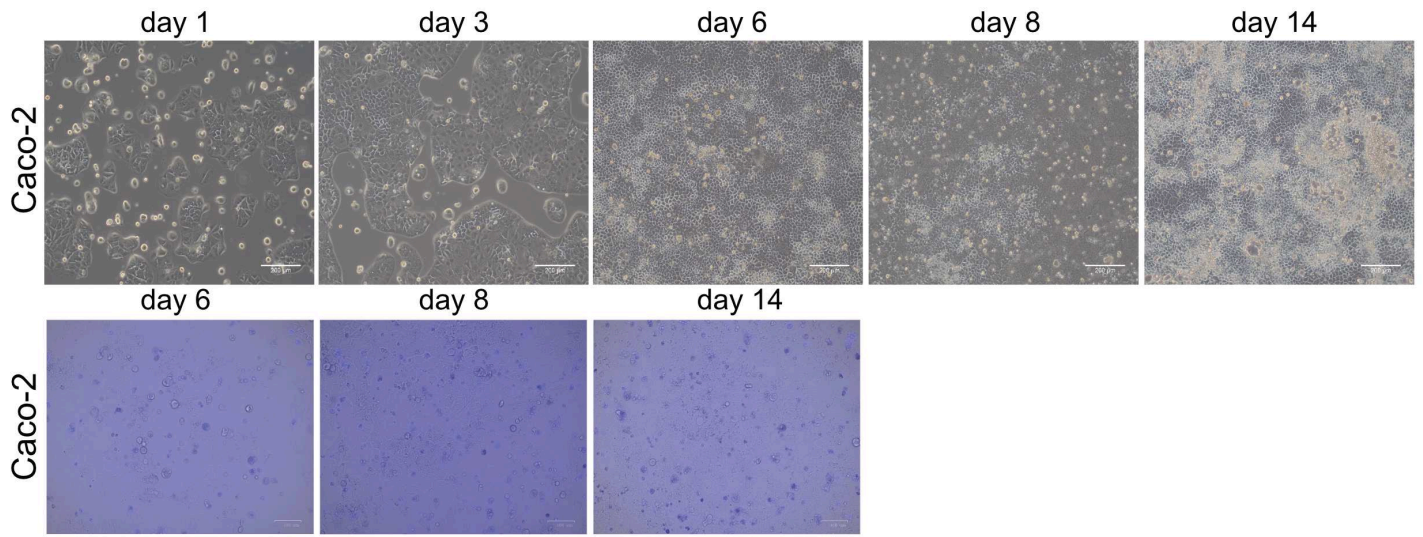

Haderer et al., Supplementary Figure 1

Supplement: gutjnl-2020-321663supp002.pdf [file gutjnl-2020-321663supp002.pdf]

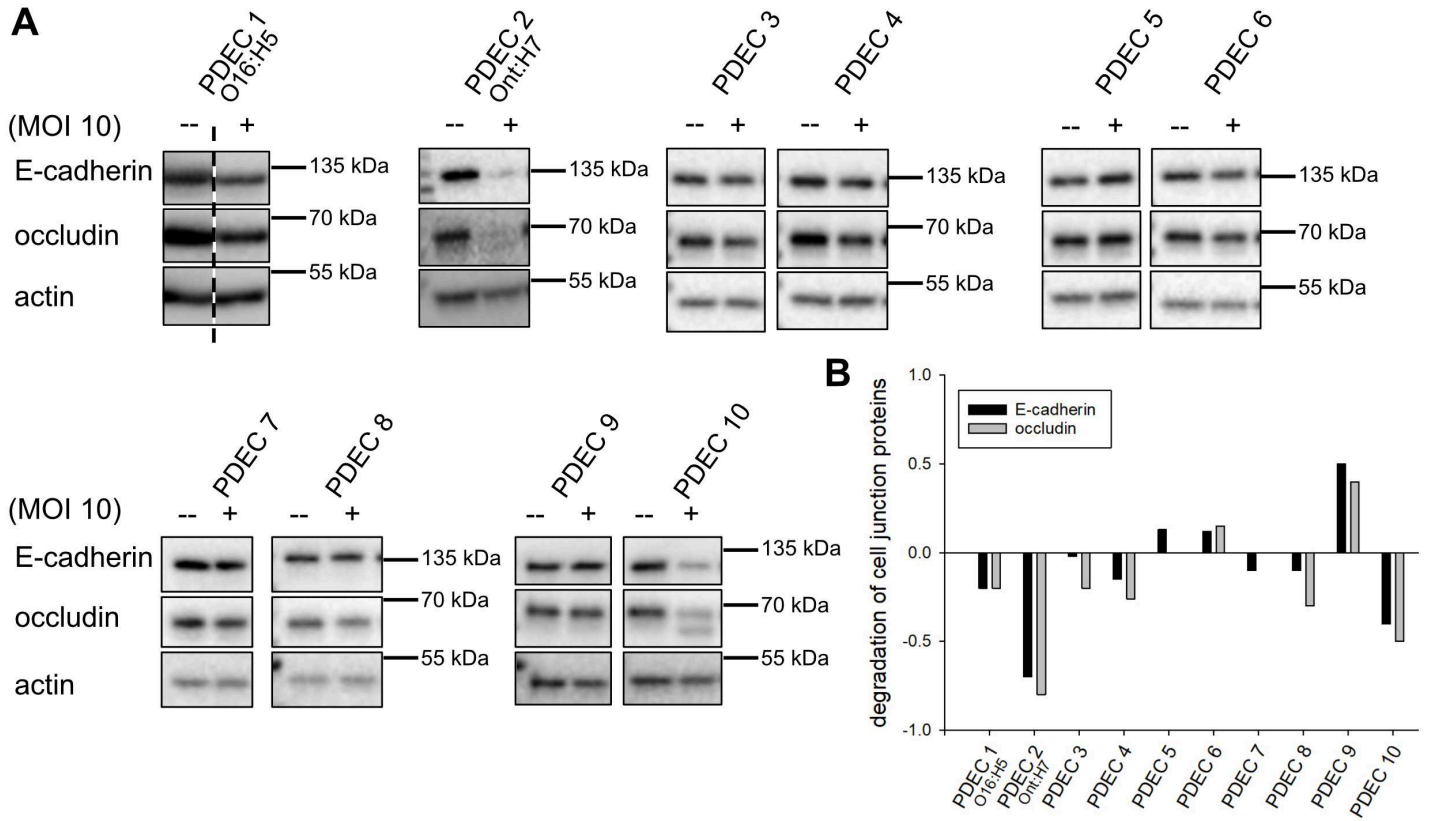

Supplement: gutjnl-2020-321663supp003.pdf [file gutjnl-2020-321663supp003.pdf]

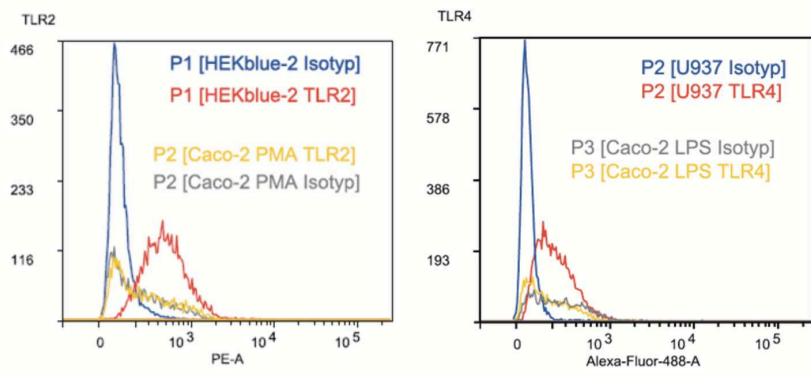

Supplement: gutjnl-2020-321663supp004.pdf [file gutjnl-2020-321663supp004.pdf]
